# Supplementary material
Source: Springer Nature journal article supplement (https://www.springermedizin.de/resource/supplementary/12985_2011_1744_MOESM5_ESM.pdf/9611008)
Supplement: MOESM5 [file 9611008]

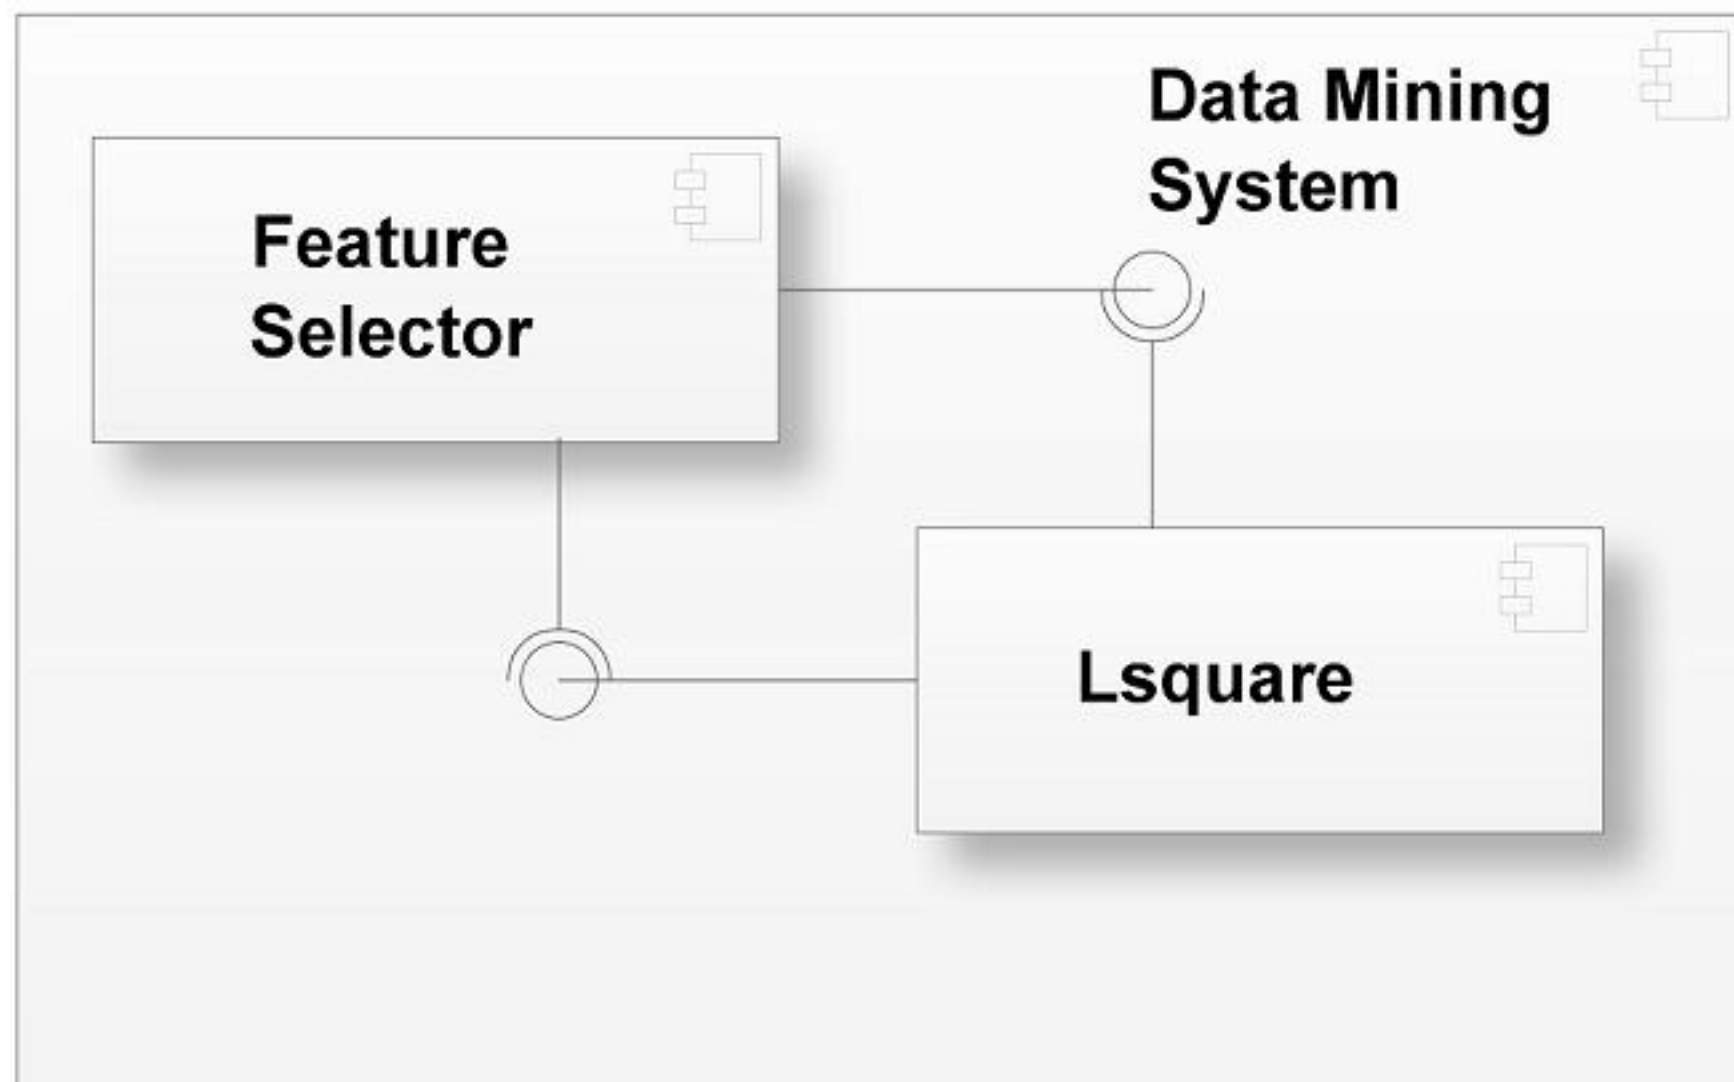

The Data Mining System performs feature selection, extracts the logic separation formulas and finally individuates the discriminat positions
